# Supplementary figures and images for: Limosilactobacillus fermentum MG4294 and Lactiplantibacillus plantarum MG5289 Ameliorates Nonalcoholic Fatty Liver Disease in High-Fat Diet-Induced Mice
Source: MDPI journal article supplement (doi:10.3390/nu15082005), 2023-04-21

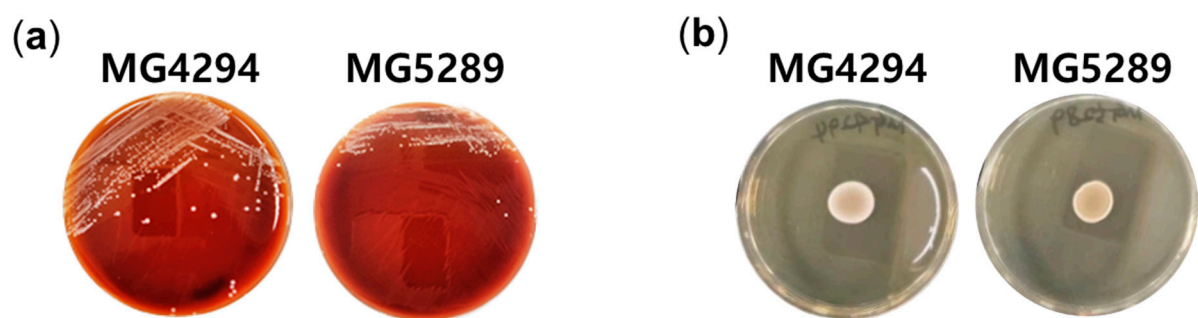

**Figure S1.** Hemolysis (a) and BSH activities (b) of *L. fermentum* MG4294 and *L. plantarum* MG5289.

Supplement: s1 [file s1]
